# Supplementary material for: Gravimetrically prepared carbon dioxide standards in support of atmospheric research
Source: Copernicus journal article supplement (doi:10.5194/amt-12-517-2019), 2019-01-28
Supplement: Supplementary file 1 [file amt-12-517-2019-supplement.zip]

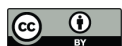

## *Supplement of*

# **Gravimetrically prepared carbon dioxide standards in support of atmospheric research**

**Bradley D. Hall et al.**

*Correspondence to:* Bradley D. Hall ([bradley.hall@noaa.gov](mailto:bradley.hall@noaa.gov))

- [amt-12-517-2019-supplement-title-page.pdf](#)
- [Supplement\\_transfer\\_line\\_tests\\_and\\_analysis.xlsx](#)

The copyright of individual parts of the supplement might differ from the CC BY 4.0 License.
