# Supplementary material for: Gravimetrically prepared carbon dioxide standards in support of atmospheric research
Source: Copernicus journal article supplement (doi:10.5194/amt-12-517-2019), 2019-01-28
Supplement: Supplementary file 1 [file Supplement_transfer_line_tests_and_analysis.xlsx]

## Sheet: README
Transfer Line Tests
see sheets "Stainless_Steel" and "AT_Steel"
0.6 mL of 10% CO2 in air was injected into CO2-free air flowing at 200 cc/min
The air stream was passed though 1-m 1/8" o.d. stainless steel or AT-steel transfer line and measured by NDIR.
We compare the peak area of the initial large CO2 peak, to smaller subsequent peaks induced by heating the transfer line
and driving off any residual CO2.
Analysis of CO2 standards
see sheet "Analysis"
https://www.esrl.noaa.gov/gmd/ccl/co2_calsystem.html

## Sheet: Stainless_Steel
time_s	CO2_ppm	H2O	P_kPa	T_cell	d_CO2		start	end	AREA
0	0.13	0.0277	86.62	23.15		Main peak	127	273	129.814
1	0.13	0.0281	86.64	23.16		Residual_1	300	580	0.0475342	first heat cycle
2	0.13	0.0276	86.61	23.15		Residual_2	630	780	0.014726	second heat cycle
3	0.13	0.0278	86.61	23.15		ratio 1			0.000366173
4	0.13	0.0281	86.63	23.15		ratio 2			0.00011344
5	0.14	0.0278	86.64	23.16					EFF		residual ppm
6	0.14	0.0276	86.63	23.15		TRANSFER EFF			0.999634		0.146469	CO2 driven off on first heat cycle
7	0.13	0.0284	86.62	23.15		TRANSFER EFF			0.999887		0.0453759	CO2 driven off on second heat cycle
8	0.14	0.0276	86.63	23.14
9	0.14	0.0275	86.63	23.15		Use 100 +/- 0.01% transfer efficiency in calculations
10	0.14	0.0278	86.62	23.15		With multiple heating cycles and substantial flushing, we expect transfer efficiency to be higher than 99.989%
11	0.14	0.0274	86.62	23.14
12	0.14	0.0278	86.61	23.15
13	0.14	0.0281	86.63	23.15
14	0.14	0.0277	86.61	23.16
15	0.14	0.0278	86.63	23.16
16	0.14	0.028	86.63	23.16
17	0.14	0.0276	86.63	23.15
18	0.14	0.0277	86.64	23.16
19	0.14	0.0281	86.62	23.16
20	0.14	0.0277	86.61	23.15
21	0.14	0.0274	86.62	23.15
22	0.14	0.0273	86.6	23.16
23	0.14	0.0274	86.63	23.15
24	0.14	0.0282	86.63	23.16
25	0.14	0.0283	86.63	23.16
26	0.15	0.0278	86.63	23.15
27	0.15	0.028	86.62	23.15
28	0.15	0.0275	86.63	23.16
29	0.15	0.0275	86.62	23.16
30	0.16	0.0275	86.63	23.17
31	0.15	0.0279	86.6	23.16
31.9	0.15	0.028	86.62	23.16
32.9	0.15	0.0277	86.59	23.16
33.9	0.15	0.0279	86.53	23.17
34.9	0.15	0.0274	86.49	23.16
35.9	0.14	0.0274	86.46	23.15
36.9	0.14	0.0278	86.44	23.16
37.9	0.14	0.0278	86.4	23.16
38.9	0.14	0.0274	86.39	23.16
39.9	0.13	0.0276	86.42	23.17
40.9	0.13	0.0275	86.44	23.17
41.9	0.14	0.0286	86.43	23.17
42.9	0.14	0.0273	86.4	23.16
43.9	0.14	0.028	86.42	23.16
44.9	0.14	0.0275	86.46	23.16
45.9	0.15	0.0277	86.46	23.18
46.9	0.15	0.0281	86.47	23.18
47.9	0.15	0.0275	86.48	23.17
48.9	0.15	0.0273	86.48	23.17
49.9	0.15	0.0276	86.49	23.17
50.9	0.15	0.0275	86.47	23.16
51.9	0.14	0.0281	86.5	23.17
52.9	0.14	0.0283	86.51	23.18
53.9	0.14	0.0279	86.48	23.17
54.9	0.15	0.0279	86.52	23.18
55.9	0.15	0.0279	86.49	23.16
56.9	0.15	0.0278	86.48	23.17
57.9	0.14	0.0276	86.5	23.17
58.9	0.14	0.0278	86.5	23.17
59.9	0.14	0.028	86.5	23.18
60.9	0.14	0.0278	86.49	23.18
61.9	0.15	0.0281	86.48	23.17
62.9	0.15	0.0281	86.5	23.18
63.9	0.15	0.0283	86.5	23.19
64.9	0.15	0.0275	86.49	23.18
65.9	0.14	0.0278	86.49	23.17
66.9	0.14	0.0272	86.49	23.18
67.9	0.14	0.0278	86.5	23.18
68.9	0.15	0.0278	86.51	23.17
69.9	0.14	0.0281	86.51	23.18
70.9	0.15	0.0282	86.5	23.18
71.9	0.14	0.0279	86.48	23.18
72.9	0.14	0.0278	86.48	23.17
73.9	0.14	0.0273	86.48	23.17
74.9	0.14	0.0275	86.5	23.17
75.9	0.14	0.0282	86.49	23.18
76.9	0.14	0.0278	86.49	23.18
77.9	0.14	0.0278	86.49	23.17
78.9	0.14	0.0279	86.48	23.18
79.9	0.14	0.0274	86.49	23.18
80.9	0.14	0.0282	86.52	23.18
81.9	0.14	0.0278	86.49	23.18
82.9	0.14	0.0278	86.48	23.19
83.9	0.14	0.028	86.5	23.19
84.9	0.14	0.0281	86.49	23.19
85.9	0.14	0.0281	86.49	23.19
86.9	0.14	0.0281	86.51	23.19
87.9	0.14	0.0272	86.49	23.18
88.9	0.14	0.0272	86.49	23.19
89.9	0.13	0.0278	86.5	23.19
90.9	0.14	0.0282	86.48	23.19
91.9	0.14	0.028	86.5	23.18
92.9	0.14	0.0278	86.5	23.19
93.9	0.14	0.0278	86.5	23.18
94.9	0.14	0.0276	86.48	23.17
95.9	0.14	0.0275	86.5	23.18
96.9	0.14	0.0278	86.49	23.18
97.9	0.13	0.0283	86.49	23.19
98.9	0.14	0.0281	86.5	23.19
99.9	0.14	0.0274	86.48	23.18
100.9	0.15	0.0277	86.47	23.19
101.9	0.15	0.0275	86.47	23.19
102.9	0.15	0.0278	86.52	23.2
103.9	0.15	0.0277	86.51	23.19
104.9	0.15	0.0285	86.51	23.2
105.9	0.15	0.0275	86.49	23.19
106.9	0.16	0.0277	86.48	23.18
107.9	0.15	0.0282	86.5	23.19
108.9	0.15	0.0275	86.51	23.2
109.9	0.14	0.0278	86.5	23.19
110.9	0.14	0.0276	86.49	23.19
111.9	0.14	0.028	86.49	23.19
112.9	0.14	0.0278	86.5	23.2
113.9	0.13	0.0277	86.49	23.19
114.9	0.13	0.0276	86.49	23.19
115.9	0.13	0.0277	86.47	23.19
116.9	0.12	0.0279	86.5	23.19
117.9	0.12	0.0275	86.51	23.2
118.9	0.12	0.0281	86.48	23.2
119.9	0.13	0.0278	86.49	23.2
120.9	0.13	0.0278	86.49	23.19
121.9	0.13	0.0275	86.5	23.19
122.9	0.13	0.0278	86.27	23.19
123.9	0.13	0.0281	86.23	23.19	0
124.9	-1.25	0.0279	86.25	23.2	-1.38
125.9	42.79	0.028	86.26	23.19	42.66
126.9	925.8	0.0281	86.27	23.2	925.67
127.9	2132.78	0.0279	86.28	23.2	2132.65
128.9	3185.6	0.0281	86.29	23.2	3185.47
129.9	3641.33	0.0278	86.27	23.19	3641.2
130.9	3706.32	0.0282	86.28	23.2	3706.19
131.9	2819.95	0.028	86.28	23.19	2819.82
132.9	1614.01	0.0278	86.27	23.19	1613.88
133.9	588.25	0.0279	86.29	23.21	588.12
134.9	161.2	0.0278	86.55	23.19	161.07
135.9	50.59	0.0279	86.56	23.19	50.46
136.9	19.96	0.0274	86.55	23.18	19.83
137.9	10.47	0.0277	86.53	23.2	10.34
138.9	6.95	0.0279	86.52	23.19	6.82
139.9	5.2	0.0276	86.52	23.2	5.07
140.9	4.08	0.0278	86.51	23.19	3.95
141.9	3.14	0.0277	86.5	23.19	3.01
142.9	2.6	0.0274	86.49	23.21	2.47
143.9	2.3	0.0276	86.5	23.2	2.17
144.9	2.09	0.0283	86.51	23.21	1.96
145.9	1.92	0.0281	86.5	23.19	1.79
146.9	1.77	0.0279	86.49	23.2	1.64
147.9	1.63	0.0273	86.5	23.2	1.5
148.9	1.51	0.028	86.49	23.2	1.38
149.9	1.4	0.0278	86.5	23.21	1.27
150.9	1.3	0.0274	86.51	23.19	1.17
151.9	1.21	0.0279	86.49	23.2	1.08
152.9	1.13	0.0278	86.5	23.21	1
153.9	1.06	0.0278	86.49	23.2	0.93
154.9	0.99	0.0277	86.5	23.2	0.86
155.9	0.93	0.0278	86.49	23.2	0.8
156.9	0.88	0.0274	86.5	23.2	0.75
157.9	0.83	0.0284	86.5	23.21	0.7
158.9	0.79	0.0284	86.5	23.2	0.66
159.9	0.75	0.0281	86.48	23.2	0.62
160.9	0.71	0.0279	86.5	23.21	0.58
161.9	0.68	0.0278	86.49	23.2	0.55
162.9	0.65	0.0273	86.47	23.2	0.52
163.9	0.62	0.0278	86.49	23.2	0.49
164.9	0.6	0.028	86.49	23.2	0.47
165.9	0.57	0.0277	86.5	23.2	0.44
166.9	0.55	0.028	86.5	23.2	0.42
167.9	0.52	0.0288	86.5	23.22	0.39
168.9	0.5	0.0271	86.5	23.2	0.37
169.9	0.49	0.0278	86.49	23.2	0.36
170.9	0.47	0.0278	86.49	23.2	0.34
171.9	0.46	0.0281	86.5	23.21	0.33
172.9	0.45	0.0274	86.48	23.21	0.32
173.9	0.43	0.0276	86.5	23.21	0.3
174.9	0.42	0.0281	86.5	23.21	0.29
175.9	0.41	0.0276	86.48	23.2	0.28
176.9	0.4	0.0271	86.48	23.2	0.27
177.9	0.39	0.0278	86.49	23.2	0.26
178.9	0.38	0.0276	86.48	23.21	0.25
179.9	0.38	0.0274	86.49	23.2	0.25
180.9	0.37	0.028	86.5	23.21	0.24
181.9	0.36	0.0276	86.48	23.21	0.23
182.9	0.35	0.0276	86.49	23.2	0.22
183.9	0.35	0.0276	86.49	23.21	0.22
184.9	0.34	0.0278	86.49	23.21	0.21
185.9	0.33	0.0282	86.49	23.22	0.2
186.9	0.32	0.0278	86.47	23.21	0.19
187.9	0.32	0.0274	86.5	23.21	0.19
188.9	0.31	0.0278	86.51	23.22	0.18
189.9	0.3	0.0285	86.51	23.22	0.17
190.9	0.29	0.0277	86.49	23.21	0.16
191.9	0.29	0.0278	86.49	23.22	0.16
192.9	0.28	0.0278	86.48	23.21	0.15
193.9	0.28	0.0281	86.48	23.22	0.15
194.9	0.27	0.0279	86.48	23.21	0.14
195.9	0.27	0.0279	86.49	23.21	0.14
196.9	0.26	0.0273	86.49	23.21	0.13
197.9	0.26	0.0274	86.47	23.21	0.13
198.9	0.26	0.0275	86.49	23.21	0.13
199.9	0.25	0.028	86.49	23.22	0.12
200.9	0.25	0.028	86.49	23.21	0.12
201.9	0.25	0.0278	86.5	23.2	0.12
202.9	0.25	0.028	86.49	23.21	0.12
203.9	0.24	0.0274	86.5	23.22	0.11
204.9	0.23	0.0278	86.5	23.21	0.1
205.8	0.23	0.0276	86.49	23.21	0.1
206.8	0.23	0.028	86.48	23.21	0.1
207.8	0.23	0.0277	86.5	23.22	0.1
208.8	0.23	0.0278	86.48	23.21	0.1
209.8	0.23	0.0276	86.49	23.21	0.1
210.8	0.22	0.0276	86.5	23.22	0.09
211.8	0.22	0.0276	86.5	23.22	0.09
212.8	0.22	0.0278	86.49	23.22	0.09
213.8	0.22	0.0274	86.5	23.21	0.09
214.8	0.21	0.0279	86.5	23.22	0.08
215.8	0.21	0.0278	86.49	23.22	0.08
216.8	0.21	0.0271	86.48	23.22	0.08
217.8	0.2	0.0273	86.49	23.22	0.07
218.8	0.2	0.028	86.51	23.22	0.07
219.8	0.2	0.0274	86.5	23.22	0.07
220.8	0.2	0.0281	86.51	23.21	0.07
221.8	0.2	0.0276	86.51	23.21	0.07
222.8	0.2	0.028	86.51	23.23	0.07
223.8	0.19	0.0271	86.49	23.21	0.06
224.8	0.2	0.0279	86.5	23.22	0.07
225.8	0.2	0.0281	86.49	23.22	0.07
226.8	0.2	0.0278	86.49	23.22	0.07
227.8	0.19	0.028	86.51	23.23	0.06
228.8	0.19	0.0274	86.5	23.22	0.06
229.8	0.19	0.0278	86.5	23.22	0.06
230.8	0.19	0.0277	86.49	23.21	0.06
231.8	0.18	0.0276	86.49	23.22	0.05
232.8	0.18	0.0275	86.48	23.22	0.05
233.8	0.18	0.0275	86.5	23.23	0.05
234.8	0.18	0.0278	86.49	23.22	0.05
235.8	0.18	0.0277	86.49	23.22	0.05
236.8	0.17	0.0281	86.49	23.23	0.04
237.8	0.17	0.0278	86.49	23.22	0.04
238.8	0.17	0.0278	86.5	23.23	0.04
239.8	0.17	0.0278	86.48	23.22	0.04
240.8	0.17	0.0278	86.49	23.23	0.04
241.8	0.17	0.0274	86.5	23.21	0.04
242.8	0.17	0.0278	86.49	23.23	0.04
243.8	0.17	0.0281	86.5	23.22	0.04
244.8	0.17	0.0275	86.5	23.22	0.04
245.8	0.17	0.0275	86.52	23.23	0.04
246.8	0.17	0.0282	86.49	23.22	0.04
247.8	0.17	0.028	86.49	23.23	0.04
248.8	0.17	0.0268	86.49	23.22	0.04
249.8	0.17	0.028	86.49	23.22	0.04
250.8	0.17	0.0281	86.5	23.22	0.04
251.8	0.17	0.0277	86.49	23.22	0.04
252.8	0.17	0.0286	86.5	23.21	0.04
253.8	0.17	0.0286	86.49	23.22	0.04
254.8	0.17	0.0281	86.5	23.23	0.04
255.8	0.17	0.0276	86.5	23.21	0.04
256.8	0.17	0.0279	86.48	23.23	0.04
257.8	0.18	0.0278	86.51	23.22	0.05
258.8	0.18	0.0277	86.5	23.22	0.05
259.8	0.17	0.0277	86.49	23.23	0.04
260.8	0.17	0.028	86.49	23.23	0.04
261.8	0.17	0.0279	86.5	23.22	0.04
262.8	0.17	0.0278	86.49	23.23	0.04
263.8	0.17	0.0278	86.5	23.23	0.04
264.8	0.17	0.0281	86.52	23.23	0.04
265.8	0.17	0.0278	86.5	23.23	0.04
266.8	0.17	0.0276	86.49	23.23	0.04
267.8	0.17	0.028	86.5	23.22	0.04
268.8	0.17	0.0276	86.5	23.23	0.04
269.8	0.17	0.028	86.49	23.23	0.04
270.8	0.17	0.028	86.5	23.24	0.04
271.8	0.16	0.0278	86.49	23.23
272.8	0.16	0.0279	86.49	23.23
273.8	0.16	0.028	86.48	23.22
274.8	0.16	0.028	86.49	23.23
275.8	0.16	0.0274	86.5	23.23	0.01
276.8	0.16	0.0274	86.5	23.23	0.01
277.8	0.16	0.0271	86.49	23.23	0.01
278.8	0.15	0.0281	86.51	23.23	0
279.8	0.15	0.0283	86.51	23.23	0
280.8	0.15	0.028	86.5	23.23	0
281.8	0.15	0.0274	86.51	23.23	0
282.8	0.15	0.0278	86.5	23.22	0
283.8	0.15	0.0273	86.5	23.23	0
284.8	0.15	0.0281	86.51	23.24	0
285.8	0.15	0.0277	86.48	23.22	0
286.8	0.14	0.0277	86.5	23.23	-0.01
287.8	0.14	0.0278	86.49	23.23	-0.01
288.8	0.14	0.0276	86.5	23.24	-0.01
289.8	0.14	0.0283	86.49	23.24	-0.01
290.8	0.15	0.028	86.51	23.23	0
291.8	0.15	0.0278	86.49	23.24	0
292.8	0.16	0.0277	86.49	23.24	0.01
293.8	0.16	0.0278	86.51	23.23	0.01
294.8	0.16	0.0276	86.49	23.24	0.01
295.8	0.16	0.0277	86.5	23.25	0.01
296.8	0.15	0.0278	86.5	23.24	0
297.8	0.15	0.0272	86.5	23.24	0
298.8	0.15	0.0278	86.5	23.23	0
299.8	0.15	0.0277	86.49	23.24	0
300.8	0.15	0.0277	86.48	23.25	0
301.8	0.15	0.0276	86.49	23.24	0
302.8	0.15	0.0275	86.49	23.24	0
303.8	0.15	0.0278	86.5	23.24	0
304.8	0.14	0.0281	86.5	23.24	-0.01
305.8	0.14	0.028	86.5	23.23	-0.01
306.8	0.14	0.0279	86.49	23.23	-0.01
307.8	0.14	0.0278	86.51	23.25	-0.01
308.8	0.14	0.0274	86.49	23.24	-0.01
309.8	0.14	0.0278	86.52	23.24	-0.01
310.8	0.15	0.0273	86.5	23.24	0
311.8	0.15	0.0275	86.5	23.24	0
312.8	0.15	0.0279	86.5	23.24	0
313.8	0.15	0.0274	86.49	23.24	0
314.8	0.15	0.0287	86.51	23.24	0
315.8	0.15	0.0278	86.51	23.24	0
316.8	0.15	0.0276	86.49	23.25	0
317.8	0.16	0.0273	86.5	23.24	0.01
318.8	0.16	0.0278	86.49	23.24	0.01
319.8	0.16	0.0278	86.48	23.24	0.01
320.8	0.16	0.0286	86.5	23.25	0.01
321.8	0.16	0.0277	86.5	23.25	0.01
322.8	0.16	0.0278	86.5	23.24	0.01
323.8	0.15	0.0274	86.5	23.24	0
324.8	0.15	0.0278	86.49	23.25	0
325.8	0.15	0.0278	86.51	23.26	0
326.8	0.15	0.0278	86.51	23.25	0
327.8	0.16	0.0276	86.49	23.25	0.01
328.8	0.16	0.0281	86.5	23.25	0.01
329.8	0.16	0.0278	86.5	23.25	0.01
330.8	0.16	0.0276	86.5	23.25	0.01
331.8	0.16	0.0285	86.51	23.25	0.01
332.8	0.15	0.0278	86.5	23.25	0
333.8	0.15	0.0273	86.5	23.25	0
334.8	0.15	0.0283	86.51	23.25	0
335.8	0.15	0.0281	86.51	23.26	0
336.8	0.16	0.0285	86.51	23.26	0.01
337.8	0.17	0.0275	86.5	23.25	0.02
338.8	0.17	0.0274	86.49	23.25	0.02
339.8	0.18	0.0279	86.51	23.27	0.03
340.8	0.18	0.0271	86.48	23.25	0.03
341.8	0.18	0.0278	86.49	23.25	0.03
342.8	0.18	0.0283	86.49	23.26	0.03
343.8	0.18	0.0277	86.49	23.25	0.03
344.8	0.18	0.0278	86.5	23.26	0.03
345.8	0.18	0.0281	86.52	23.25	0.03
346.8	0.18	0.0278	86.48	23.26	0.03
347.8	0.18	0.0276	86.5	23.24	0.03
348.8	0.18	0.0279	86.5	23.26	0.03
349.8	0.18	0.028	86.5	23.26	0.03
350.8	0.18	0.0279	86.49	23.26	0.03
351.8	0.17	0.0279	86.51	23.26	0.02
352.8	0.17	0.0275	86.5	23.25	0.02
353.8	0.17	0.0276	86.5	23.27	0.02
354.8	0.17	0.028	86.5	23.27	0.02
355.8	0.17	0.0282	86.5	23.27	0.02
356.8	0.17	0.0278	86.5	23.27	0.02
357.8	0.17	0.028	86.51	23.26	0.02
358.8	0.18	0.0275	86.5	23.27	0.03
359.8	0.18	0.0277	86.49	23.27	0.03
360.8	0.18	0.0281	86.49	23.27	0.03
361.8	0.18	0.0278	86.51	23.27	0.03
362.8	0.18	0.0276	86.51	23.26	0.03
363.8	0.18	0.0276	86.47	23.27	0.03
364.8	0.18	0.0274	86.5	23.27	0.03
365.8	0.19	0.0285	86.5	23.27	0.04
366.8	0.19	0.0277	86.49	23.27	0.04
367.8	0.19	0.0283	86.51	23.28	0.04
368.8	0.19	0.0277	86.49	23.27	0.04
369.8	0.19	0.028	86.51	23.28	0.04
370.8	0.19	0.0279	86.48	23.27	0.04
371.8	0.19	0.0275	86.49	23.29	0.04
372.8	0.19	0.0278	86.49	23.27	0.04
373.8	0.19	0.0274	86.49	23.28	0.04
374.8	0.19	0.0285	86.49	23.28	0.04
375.8	0.19	0.0278	86.49	23.28	0.04
376.8	0.19	0.0278	86.51	23.28	0.04
377.8	0.19	0.0281	86.49	23.28	0.04
378.8	0.19	0.0278	86.51	23.28	0.04
379.7	0.19	0.028	86.5	23.28	0.04
380.7	0.19	0.0277	86.48	23.28	0.04
381.7	0.18	0.0276	86.5	23.28	0.03
382.7	0.18	0.0278	86.5	23.28	0.03
383.7	0.18	0.0277	86.5	23.28	0.03
384.7	0.18	0.0277	86.52	23.29	0.03
385.7	0.19	0.0277	86.5	23.28	0.04
386.7	0.19	0.028	86.5	23.28	0.04
387.7	0.19	0.0275	86.5	23.28	0.04
388.7	0.19	0.0274	86.49	23.28	0.04
389.7	0.19	0.0279	86.5	23.28	0.04
390.7	0.19	0.0278	86.49	23.28	0.04
391.7	0.19	0.0277	86.5	23.29	0.04
392.7	0.19	0.0278	86.49	23.29	0.04
393.7	0.19	0.0276	86.5	23.29	0.04
394.7	0.2	0.0278	86.49	23.29	0.05
395.7	0.2	0.0281	86.49	23.3	0.05
396.7	0.2	0.0274	86.5	23.29	0.05
397.7	0.2	0.0281	86.49	23.29	0.05
398.7	0.2	0.0276	86.49	23.29	0.05
399.7	0.19	0.0279	86.49	23.29	0.04
400.7	0.18	0.0279	86.5	23.29	0.03
401.7	0.18	0.0278	86.51	23.3	0.03
402.7	0.17	0.0284	86.49	23.29	0.02
403.7	0.17	0.0281	86.51	23.29	0.02
404.7	0.17	0.0271	86.5	23.29	0.02
405.7	0.17	0.0278	86.48	23.29	0.02
406.7	0.17	0.0274	86.49	23.3	0.02
407.7	0.18	0.0281	86.51	23.3	0.03
408.7	0.18	0.0282	86.5	23.29	0.03
409.7	0.19	0.0278	86.51	23.3	0.04
410.7	0.19	0.0274	86.5	23.3	0.04
411.7	0.19	0.0275	86.49	23.3	0.04
412.7	0.19	0.0281	86.49	23.3	0.04
413.7	0.19	0.0279	86.5	23.3	0.04
414.7	0.19	0.0281	86.5	23.29	0.04
415.7	0.19	0.0275	86.48	23.3	0.04
416.7	0.2	0.0272	86.49	23.3	0.05
417.7	0.2	0.0278	86.5	23.29	0.05
418.7	0.21	0.0277	86.49	23.3	0.06
419.7	0.21	0.0279	86.5	23.31	0.06
420.7	0.21	0.0278	86.5	23.3	0.06
421.7	0.2	0.0277	86.51	23.3	0.05
422.7	0.2	0.0274	86.5	23.31	0.05
423.7	0.2	0.0279	86.49	23.3	0.05
424.7	0.2	0.0275	86.5	23.3	0.05
425.7	0.19	0.0274	86.51	23.31	0.04
426.7	0.19	0.028	86.5	23.32	0.04
427.7	0.19	0.0284	86.5	23.3	0.04
428.7	0.19	0.028	86.5	23.31	0.04
429.7	0.19	0.028	86.5	23.3	0.04
430.7	0.19	0.0281	86.51	23.31	0.04
431.7	0.2	0.028	86.5	23.3	0.05
432.7	0.2	0.0279	86.49	23.31	0.05
433.7	0.2	0.0272	86.5	23.3	0.05
434.7	0.2	0.0276	86.5	23.32	0.05
435.7	0.2	0.0274	86.5	23.3	0.05
436.7	0.19	0.0278	86.5	23.32	0.04
437.7	0.19	0.0275	86.5	23.31	0.04
438.7	0.19	0.0276	86.51	23.32	0.04
439.7	0.19	0.0277	86.51	23.32	0.04
440.7	0.18	0.0276	86.49	23.31	0.03
441.7	0.18	0.0272	86.5	23.32	0.03
442.7	0.18	0.0278	86.49	23.32	0.03
443.7	0.18	0.0281	86.5	23.32	0.03
444.7	0.18	0.0276	86.5	23.31	0.03
445.7	0.18	0.0275	86.5	23.31	0.03
446.7	0.17	0.028	86.48	23.32	0.02
447.7	0.17	0.028	86.48	23.31	0.02
448.7	0.18	0.0281	86.5	23.32	0.03
449.7	0.18	0.0277	86.5	23.32	0.03
450.7	0.17	0.0277	86.5	23.32	0.02
451.7	0.17	0.0274	86.5	23.32	0.02
452.7	0.17	0.0274	86.51	23.31	0.02
453.7	0.17	0.0279	86.5	23.32	0.02
454.7	0.17	0.0281	86.5	23.32	0.02
455.7	0.17	0.0281	86.49	23.32	0.02
456.7	0.17	0.0279	86.48	23.32	0.02
457.7	0.18	0.0285	86.51	23.33	0.03
458.7	0.18	0.0278	86.49	23.32	0.03
459.7	0.18	0.0276	86.5	23.32	0.03
460.7	0.18	0.0279	86.49	23.32	0.03
461.7	0.18	0.0275	86.49	23.33	0.03
462.7	0.18	0.0279	86.52	23.33	0.03
463.7	0.18	0.0275	86.49	23.32	0.03
464.7	0.18	0.0285	86.49	23.33	0.03
465.7	0.18	0.0275	86.48	23.33	0.03
466.7	0.18	0.0276	86.5	23.32	0.03
467.7	0.17	0.0277	86.5	23.33	0.02
468.7	0.18	0.0279	86.49	23.33	0.03
469.7	0.18	0.0281	86.48	23.32	0.03
470.7	0.18	0.0278	86.5	23.32	0.03
471.7	0.18	0.0277	86.48	23.32	0.03
472.7	0.19	0.0278	86.49	23.33	0.04
473.7	0.18	0.028	86.5	23.33	0.03
474.7	0.18	0.0277	86.5	23.33	0.03
475.7	0.19	0.0275	86.51	23.33	0.04
476.7	0.18	0.028	86.49	23.33	0.03
477.7	0.18	0.0274	86.5	23.33	0.03
478.7	0.19	0.0278	86.48	23.33	0.04
479.7	0.18	0.0273	86.5	23.33	0.03
480.7	0.18	0.0284	86.5	23.34	0.03
481.7	0.18	0.0285	86.5	23.34	0.03
482.7	0.18	0.0276	86.5	23.35	0.03
483.7	0.18	0.0276	86.5	23.33	0.03
484.7	0.18	0.0284	86.5	23.34	0.03
485.7	0.17	0.0279	86.5	23.33	0.02
486.7	0.17	0.0281	86.52	23.33	0.02
487.7	0.16	0.0277	86.49	23.33	0.01
488.7	0.16	0.0276	86.51	23.33	0.01
489.7	0.16	0.0274	86.49	23.34	0.01
490.7	0.16	0.0278	86.49	23.33	0.01
491.7	0.16	0.028	86.49	23.33	0.01
492.7	0.16	0.0279	86.49	23.34	0.01
493.7	0.16	0.0275	86.5	23.34	0.01
494.7	0.16	0.0279	86.5	23.34	0.01
495.7	0.16	0.0276	86.5	23.33	0.01
496.7	0.16	0.0278	86.48	23.34	0.01
497.7	0.16	0.028	86.51	23.34	0.01
498.7	0.16	0.0274	86.52	23.33	0.01
499.7	0.17	0.0275	86.49	23.33	0.02
500.7	0.17	0.0279	86.5	23.34	0.02
501.7	0.17	0.0271	86.5	23.33	0.02
502.7	0.17	0.0275	86.5	23.33	0.02
503.7	0.17	0.0282	86.48	23.34	0.02
504.7	0.17	0.0272	86.49	23.34	0.02
505.7	0.17	0.0284	86.48	23.34	0.02
506.7	0.17	0.0277	86.49	23.34	0.02
507.7	0.17	0.0281	86.51	23.36	0.02
508.7	0.17	0.0275	86.49	23.35	0.02
509.7	0.17	0.0274	86.5	23.34	0.02
510.7	0.17	0.0274	86.48	23.34	0.02
511.7	0.18	0.0278	86.5	23.33	0.03
512.7	0.18	0.0277	86.49	23.34	0.03
513.7	0.18	0.0274	86.49	23.34	0.03
514.7	0.18	0.0273	86.5	23.35	0.03
515.7	0.18	0.0274	86.49	23.35	0.03
516.7	0.18	0.028	86.49	23.34	0.03
517.7	0.18	0.0277	86.5	23.35	0.03
518.7	0.18	0.0277	86.49	23.34	0.03
519.7	0.18	0.0275	86.49	23.34	0.03
520.7	0.17	0.0276	86.5	23.35	0.02
521.7	0.17	0.0274	86.48	23.33	0.02
522.7	0.17	0.0281	86.5	23.34	0.02
523.7	0.16	0.0282	86.51	23.35	0.01
524.7	0.16	0.0274	86.48	23.35	0.01
525.7	0.17	0.0278	86.48	23.35	0.02
526.7	0.17	0.0275	86.52	23.34	0.02
527.7	0.17	0.0283	86.5	23.35	0.02
528.7	0.17	0.0278	86.49	23.36	0.02
529.7	0.17	0.028	86.5	23.35	0.02
530.7	0.16	0.0276	86.49	23.34	0.01
531.7	0.16	0.0279	86.49	23.35	0.01
532.7	0.16	0.0278	86.5	23.35	0.01
533.7	0.16	0.028	86.49	23.35	0.01
534.7	0.17	0.0275	86.5	23.35	0.02
535.7	0.17	0.0278	86.5	23.35	0.02
536.7	0.17	0.028	86.51	23.35	0.02
537.7	0.18	0.0278	86.48	23.35	0.03
538.7	0.18	0.0277	86.5	23.35	0.03
539.7	0.18	0.028	86.5	23.35	0.03
540.7	0.18	0.0274	86.49	23.35	0.03
541.7	0.18	0.028	86.51	23.36	0.03
542.7	0.18	0.028	86.5	23.35	0.03
543.7	0.18	0.0281	86.49	23.36	0.03
544.7	0.18	0.0278	86.49	23.35	0.03
545.7	0.17	0.0287	86.51	23.36	0.02
546.7	0.17	0.028	86.5	23.36	0.02
547.7	0.17	0.0275	86.5	23.36	0.02
548.7	0.17	0.0275	86.5	23.36	0.02
549.7	0.18	0.0273	86.49	23.35	0.03
550.7	0.17	0.0278	86.5	23.35	0.02
551.7	0.17	0.0281	86.48	23.35	0.02
552.6	0.16	0.0278	86.48	23.36	0.01
553.6	0.16	0.0278	86.49	23.36	0.01
554.6	0.16	0.0281	86.5	23.37	0.01
555.6	0.16	0.0281	86.48	23.36	0.01
556.6	0.17	0.0274	86.47	23.36	0.02
557.6	0.17	0.0276	86.49	23.35	0.02
558.6	0.17	0.0281	86.51	23.35	0.02
559.6	0.17	0.028	86.47	23.35	0.02
560.6	0.17	0.0284	86.49	23.35	0.02
561.6	0.17	0.0275	86.49	23.36	0.02
562.6	0.17	0.0274	86.48	23.36	0.02
563.6	0.17	0.0278	86.49	23.36	0.02
564.6	0.17	0.0277	86.5	23.36	0.02
565.6	0.17	0.0277	86.5	23.36	0.02
566.6	0.17	0.0275	86.48	23.37	0.02
567.6	0.17	0.0278	86.5	23.36	0.02
568.6	0.17	0.0277	86.5	23.37	0.02
569.6	0.17	0.0278	86.51	23.37	0.02
570.6	0.17	0.0283	86.49	23.36	0.02
571.6	0.17	0.0282	86.5	23.37	0.02
572.6	0.17	0.0277	86.48	23.36	0.02
573.6	0.17	0.0275	86.49	23.36	0.02
574.6	0.17	0.0273	86.49	23.36	0.02
575.6	0.16	0.0281	86.49	23.36	0.01
576.6	0.17	0.028	86.48	23.36	0.02
577.6	0.17	0.0281	86.5	23.36	0.02
578.6	0.17	0.0285	86.48	23.37
579.6	0.17	0.0278	86.5	23.36
580.6	0.17	0.0281	86.51	23.37
581.6	0.16	0.0274	86.49	23.37
582.6	0.16	0.0278	86.49	23.37
583.6	0.16	0.028	86.48	23.37
584.6	0.16	0.0279	86.5	23.37
585.6	0.17	0.028	86.51	23.36
586.6	0.17	0.0274	86.49	23.37
587.6	0.17	0.0277	86.49	23.37
588.6	0.18	0.0272	86.48	23.37
589.6	0.18	0.0271	86.49	23.37
590.6	0.19	0.0279	86.5	23.36
591.6	0.18	0.0282	86.5	23.37
592.6	0.18	0.0277	86.5	23.37
593.6	0.18	0.028	86.48	23.37
594.6	0.18	0.0278	86.49	23.37
595.6	0.17	0.0279	86.49	23.37
596.6	0.17	0.0278	86.5	23.37
597.6	0.17	0.028	86.5	23.37
598.6	0.17	0.0281	86.5	23.37
599.6	0.17	0.0281	86.49	23.38
600.6	0.17	0.0281	86.52	23.37
601.6	0.17	0.0273	86.49	23.37
602.6	0.17	0.0276	86.5	23.37
603.6	0.18	0.0278	86.49	23.37
604.6	0.18	0.0281	86.49	23.38
605.6	0.18	0.0278	86.49	23.37
606.6	0.18	0.0272	86.49	23.37
607.6	0.18	0.0278	86.51	23.37
608.6	0.18	0.0283	86.5	23.39
609.6	0.18	0.0276	86.5	23.38
610.6	0.17	0.0279	86.5	23.37	0
611.6	0.17	0.0282	86.52	23.38	0
612.6	0.17	0.0278	86.48	23.37	0
613.6	0.17	0.0275	86.49	23.38	0
614.6	0.17	0.0276	86.49	23.38	0
615.6	0.17	0.0274	86.5	23.39	0
616.6	0.17	0.0279	86.5	23.38	0
617.6	0.17	0.0278	86.48	23.38	0
618.6	0.17	0.0273	86.49	23.37	0
619.6	0.17	0.0271	86.5	23.37	0
620.6	0.17	0.0274	86.5	23.38	0
621.6	0.18	0.0277	86.49	23.39	0.01
622.6	0.18	0.0276	86.49	23.38	0.01
623.6	0.18	0.0278	86.48	23.37	0.01
624.6	0.18	0.028	86.5	23.38	0.01
625.6	0.18	0.0278	86.49	23.38	0.01
626.6	0.18	0.0276	86.51	23.39	0.01
627.6	0.18	0.0277	86.5	23.39	0.01
628.6	0.17	0.0279	86.5	23.38	0
629.6	0.17	0.0278	86.5	23.38	0
630.6	0.17	0.0279	86.5	23.39	0
631.6	0.17	0.0278	86.49	23.39	0
632.6	0.17	0.0279	86.49	23.39	0
633.6	0.17	0.0281	86.47	23.38	0
634.6	0.18	0.0275	86.49	23.4	0.01
635.6	0.18	0.0277	86.51	23.39	0.01
636.6	0.18	0.0278	86.48	23.39	0.01
637.6	0.18	0.028	86.48	23.38	0.01
638.6	0.18	0.0276	86.5	23.39	0.01
639.6	0.18	0.0274	86.5	23.4	0.01
640.6	0.18	0.0278	86.49	23.4	0.01
641.6	0.18	0.0278	86.49	23.39	0.01
642.6	0.17	0.0282	86.51	23.4	0
643.6	0.17	0.0281	86.51	23.39	0
644.6	0.17	0.0277	86.49	23.39	0
645.6	0.17	0.0282	86.5	23.39	0
646.6	0.17	0.0277	86.49	23.39	0
647.6	0.17	0.0278	86.51	23.4	0
648.6	0.17	0.028	86.49	23.4	0
649.6	0.17	0.0278	86.5	23.39	0
650.6	0.18	0.0281	86.5	23.4	0.01
651.6	0.18	0.0278	86.49	23.4	0.01
652.6	0.18	0.0277	86.48	23.4	0.01
653.6	0.18	0.0274	86.47	23.4	0.01
654.6	0.18	0.0278	86.5	23.4	0.01
655.6	0.17	0.0274	86.49	23.4	0
656.6	0.18	0.0281	86.49	23.41	0.01
657.6	0.18	0.0274	86.49	23.4	0.01
658.6	0.18	0.0284	86.48	23.4	0.01
659.6	0.18	0.0282	86.5	23.41	0.01
660.6	0.19	0.0271	86.48	23.4	0.02
661.6	0.19	0.0274	86.5	23.4	0.02
662.6	0.2	0.0278	86.49	23.4	0.03
663.6	0.2	0.0277	86.49	23.41	0.03
664.6	0.19	0.0271	86.48	23.4	0.02
665.6	0.19	0.0281	86.47	23.41	0.02
666.6	0.19	0.0277	86.49	23.4	0.02
667.6	0.19	0.0273	86.5	23.4	0.02
668.6	0.19	0.0277	86.49	23.41	0.02
669.6	0.19	0.0278	86.5	23.4	0.02
670.6	0.19	0.0281	86.48	23.41	0.02
671.6	0.2	0.0278	86.49	23.4	0.03
672.6	0.2	0.0279	86.5	23.41	0.03
673.6	0.2	0.0278	86.48	23.41	0.03
674.6	0.2	0.0271	86.49	23.4	0.03
675.6	0.2	0.0281	86.49	23.41	0.03
676.6	0.2	0.0275	86.49	23.41	0.03
677.6	0.2	0.028	86.48	23.4	0.03
678.6	0.21	0.0282	86.49	23.42	0.04
679.6	0.2	0.0278	86.49	23.41	0.03
680.6	0.2	0.0277	86.47	23.41	0.03
681.6	0.2	0.0276	86.51	23.41	0.03
682.6	0.2	0.0277	86.47	23.41	0.03
683.6	0.2	0.0277	86.5	23.41	0.03
684.6	0.19	0.0278	86.49	23.42	0.02
685.6	0.19	0.028	86.5	23.41	0.02
686.6	0.19	0.0278	86.5	23.42	0.02
687.6	0.18	0.0278	86.5	23.4	0.01
688.6	0.18	0.028	86.49	23.41	0.01
689.6	0.19	0.0277	86.5	23.41	0.02
690.6	0.19	0.0281	86.48	23.42	0.02
691.6	0.2	0.0281	86.5	23.42	0.03
692.6	0.2	0.0281	86.5	23.42	0.03
693.6	0.2	0.0278	86.49	23.42	0.03
694.6	0.2	0.0278	86.5	23.42	0.03
695.6	0.2	0.0275	86.48	23.41	0.03
696.6	0.2	0.0281	86.5	23.43	0.03
697.6	0.2	0.0273	86.5	23.42	0.03
698.6	0.2	0.0273	86.5	23.41	0.03
699.6	0.2	0.0276	86.5	23.41	0.03
700.6	0.2	0.028	86.49	23.42	0.03
701.6	0.2	0.0275	86.5	23.42	0.03
702.6	0.2	0.0281	86.5	23.41	0.03
703.6	0.2	0.0283	86.48	23.43	0.03
704.6	0.2	0.0277	86.5	23.42	0.03
705.6	0.2	0.0281	86.5	23.42	0.03
706.6	0.2	0.0275	86.49	23.42	0.03
707.6	0.19	0.0274	86.5	23.42	0.02
708.6	0.19	0.0278	86.5	23.42	0.02
709.6	0.18	0.0274	86.51	23.43	0.01
710.6	0.18	0.0278	86.49	23.42	0.01
711.6	0.18	0.0278	86.49	23.42	0.01
712.6	0.17	0.0278	86.49	23.43	0
713.6	0.17	0.028	86.49	23.42	0
714.6	0.18	0.0275	86.49	23.43	0.01
715.6	0.18	0.0276	86.48	23.43	0.01
716.6	0.18	0.0274	86.49	23.42	0.01
717.6	0.18	0.0274	86.49	23.42	0.01
718.6	0.18	0.0273	86.48	23.42	0.01
719.6	0.17	0.0277	86.48	23.43	0
720.6	0.17	0.0275	86.49	23.43	0
721.6	0.17	0.0277	86.48	23.43	0
722.6	0.17	0.0277	86.48	23.44	0
723.6	0.17	0.0276	86.47	23.42	0
724.6	0.17	0.0278	86.5	23.43	0
725.5	0.18	0.0278	86.49	23.42	0.01
726.5	0.18	0.0281	86.48	23.42	0.01
727.5	0.18	0.0275	86.48	23.43	0.01
728.5	0.18	0.0276	86.47	23.43	0.01
729.5	0.18	0.028	86.48	23.43	0.01
730.5	0.18	0.0275	86.48	23.42	0.01
731.5	0.18	0.0277	86.49	23.43	0.01
732.5	0.18	0.0278	86.48	23.42	0.01
733.5	0.18	0.0275	86.5	23.43	0.01
734.5	0.18	0.0277	86.49	23.43	0.01
735.5	0.18	0.0274	86.48	23.42	0.01
736.5	0.18	0.0279	86.51	23.43	0.01
737.5	0.18	0.0278	86.49	23.43	0.01
738.5	0.19	0.0279	86.49	23.43	0.02
739.5	0.19	0.0278	86.49	23.43	0.02
740.5	0.19	0.0278	86.48	23.44	0.02
741.5	0.19	0.0279	86.5	23.43	0.02
742.5	0.19	0.0277	86.5	23.44	0.02
743.5	0.19	0.028	86.49	23.43	0.02
744.5	0.18	0.0278	86.49	23.44	0.01
745.5	0.18	0.0274	86.48	23.43	0.01
746.5	0.18	0.028	86.49	23.44	0.01
747.5	0.17	0.0278	86.48	23.44	0
748.5	0.17	0.0286	86.49	23.45	0
749.5	0.17	0.0281	86.5	23.43	0
750.5	0.17	0.0285	86.48	23.44	0
751.5	0.18	0.0281	86.49	23.43	0.01
752.5	0.18	0.0272	86.48	23.43	0.01
753.5	0.18	0.028	86.48	23.43	0.01
754.5	0.18	0.0285	86.49	23.44	0.01
755.5	0.18	0.028	86.5	23.44	0.01
756.5	0.18	0.0279	86.5	23.44	0.01
757.5	0.18	0.0278	86.49	23.44	0.01
758.5	0.18	0.0279	86.49	23.44	0.01
759.5	0.18	0.0275	86.48	23.44	0.01
760.5	0.18	0.0278	86.5	23.44	0.01
761.5	0.18	0.0281	86.49	23.45	0.01
762.5	0.18	0.0277	86.5	23.44	0.01
763.5	0.18	0.0273	86.48	23.44	0.01
764.5	0.18	0.0276	86.49	23.44	0.01
765.5	0.18	0.0278	86.49	23.44	0.01
766.5	0.18	0.0277	86.49	23.45	0.01
767.5	0.18	0.0278	86.49	23.43	0.01
768.5	0.18	0.0273	86.49	23.44	0.01
769.5	0.18	0.0275	86.5	23.45	0.01
770.5	0.18	0.0278	86.48	23.44	0.01
771.5	0.18	0.0277	86.5	23.44	0.01
772.5	0.18	0.0276	86.49	23.44	0.01
773.5	0.18	0.0276	86.49	23.44	0.01
774.5	0.18	0.0281	86.5	23.45	0.01
775.5	0.18	0.0274	86.49	23.44	0.01
776.5	0.18	0.0275	86.49	23.45	0.01
777.5	0.18	0.0276	86.5	23.44	0.01
778.5	0.18	0.0279	86.5	23.45	0.01
779.5	0.19	0.0281	86.49	23.45	0.02
780.5	0.19	0.0279	86.49	23.45	0.02
781.5	0.19	0.0279	86.5	23.45	0.02
782.5	0.19	0.0274	86.5	23.45	0.02
783.5	0.18	0.0276	86.48	23.45	0.01
784.5	0.18	0.0275	86.48	23.45	0.01
785.5	0.18	0.0282	86.48	23.45	0.01
786.5	0.18	0.0278	86.48	23.45	0.01
787.5	0.18	0.0277	86.49	23.45	0.01
788.5	0.17	0.0278	86.49	23.45	0
789.5	0.17	0.0278	86.49	23.46	0
790.5	0.17	0.0277	86.5	23.45	0
791.5	0.16	0.0279	86.49	23.45	-0.01
792.5	0.16	0.0278	86.51	23.44	-0.01
793.5	0.16	0.0281	86.49	23.46	-0.01
794.5	0.16	0.0278	86.48	23.45	-0.01
795.5	0.16	0.0276	86.5	23.45	-0.01
796.5	0.16	0.0277	86.49	23.45
797.5	0.17	0.0276	86.48	23.45
798.5	0.17	0.0279	86.49	23.45
799.5	0.17	0.0277	86.5	23.45
800.5	0.17	0.0276	86.49	23.46
801.5	0.17	0.0278	86.5	23.46
802.5	0.17	0.0278	86.5	23.46
803.5	0.16	0.0275	86.49	23.46
804.5	0.16	0.0276	86.5	23.45
805.5	0.17	0.0278	86.48	23.46
806.5	0.17	0.0278	86.52	23.45
807.5	0.17	0.0281	86.51	23.45
808.5	0.17	0.0278	86.49	23.46
809.5	0.16	0.028	86.47	23.46
810.5	0.16	0.0277	86.48	23.45
811.5	0.16	0.0281	86.49	23.46
812.5	0.16	0.0278	86.5	23.46
813.5	0.16	0.0279	86.49	23.46
814.5	0.16	0.0278	86.5	23.46
815.5	0.16	0.0277	86.5	23.45
816.5	0.16	0.0278	86.5	23.46
817.5	0.16	0.0275	86.51	23.46
818.5	0.17	0.028	86.49	23.46
819.5	0.17	0.0275	86.49	23.47
820.5	0.17	0.0281	86.51	23.46
821.5	0.17	0.0279	86.48	23.46
822.5	0.17	0.0276	86.49	23.46
823.5	0.17	0.0278	86.5	23.46
824.5	0.17	0.028	86.5	23.47
825.5	0.17	0.0277	86.49	23.47
826.5	0.17	0.0279	86.49	23.45
827.5	0.18	0.0282	86.5	23.47
828.5	0.18	0.0275	86.5	23.47
829.5	0.18	0.0273	86.5	23.46
830.5	0.18	0.0281	86.49	23.47
831.5	0.18	0.0276	86.51	23.46
832.5	0.17	0.028	86.48	23.46
833.5	0.17	0.0274	86.48	23.47
834.5	0.18	0.0276	86.49	23.46
835.5	0.18	0.028	86.48	23.46
836.5	0.18	0.0278	86.48	23.47
837.5	0.18	0.0276	86.5	23.47
838.5	0.17	0.0278	86.5	23.47
839.5	0.17	0.028	86.5	23.47
840.5	0.17	0.0273	86.49	23.47
841.5	0.17	0.0277	86.5	23.46
842.5	0.17	0.0275	86.49	23.48
843.5	0.17	0.028	86.48	23.46
844.5	0.17	0.0274	86.51	23.47
845.5	0.18	0.028	86.5	23.47
846.5	0.17	0.0281	86.49	23.47
847.5	0.17	0.0275	86.48	23.48
848.5	0.17	0.0274	86.5	23.48
849.5	0.17	0.0274	86.5	23.48
850.5	0.17	0.0276	86.49	23.47
851.5	0.18	0.0278	86.5	23.47
852.5	0.19	0.0277	86.49	23.47
853.5	0.19	0.0281	86.48	23.49
854.5	0.18	0.0286	86.5	23.47
855.5	0.18	0.0278	86.5	23.47
856.5	0.18	0.0278	86.49	23.48
857.5	0.18	0.0274	86.5	23.47
858.5	0.18	0.0282	86.51	23.49
859.5	0.18	0.0277	86.5	23.48
860.5	0.18	0.0277	86.5	23.48
861.5	0.18	0.0273	86.51	23.47
862.5	0.18	0.0277	86.47	23.47
863.5	0.18	0.028	86.51	23.47
864.5	0.18	0.0277	86.5	23.47
865.5	0.18	0.0281	86.5	23.48
866.5	0.18	0.028	86.51	23.48
867.5	0.18	0.0278	86.5	23.48
868.5	0.18	0.0285	86.5	23.48
869.5	0.18	0.0278	86.49	23.48
870.5	0.18	0.0278	86.51	23.48
871.5	0.18	0.0276	86.48	23.49
872.5	0.18	0.0276	86.5	23.48
873.5	0.17	0.0281	86.5	23.47
874.5	0.17	0.0281	86.5	23.49

## Sheet: AT_Steel
time_s	CO2_ppm	H2O	kPa	T_cell	dCO2		start	end	AREA
0	0.26	0.0273	Nan	24.09		Main peak	63	212	123.81
1	0.26	0.0278	Nan	24.08		Residual_1	300	550	0.0328	first heat cycle
2	0.26	0.0274	Nan	24.09		Residual_2	600	750	0.015	second heat cycle
3	0.26	0.0277	Nan	24.1		ratio 1			0.000264922
4	0.26	0.0281	Nan	24.1		ratio 2			0.000121154
5	0.26	0.0285	Nan	24.1					Eff		residual ppm
6	0.27	0.0277	Nan	24.09		TRANSFER EFF			0.999735		0.105969	CO2 driven off on first heat cycle
7	0.26	0.0281	Nan	24.09		TRANSFER EFF			0.999879		0.0484614	CO2 driven off on second heat cycle
8	0.26	0.0278	Nan	24.1		Use 100 +/- 0.01% transfer efficiency in calculations
9	0.26	0.0274	Nan	24.1		With multiple heating cycles and substantial flushing, we expect transfer efficiency to be higher than 99.988%
10	0.26	0.0278	Nan	24.1
11	0.25	0.0274	Nan	24.09
12	0.26	0.0276	Nan	24.09
13	0.26	0.0276	Nan	24.09
14	0.26	0.028	Nan	24.08
15	0.26	0.0278	Nan	24.09
16	0.27	0.0272	Nan	24.1
17	0.27	0.0281	Nan	24.1
18	0.27	0.0274	Nan	24.09
19	0.27	0.0276	Nan	24.09
19.9	0.27	0.0278	Nan	24.09
20.9	0.27	0.0275	Nan	24.09
21.9	0.27	0.0281	Nan	24.09
22.9	0.27	0.0284	Nan	24.09
23.9	0.28	0.0278	Nan	24.1
24.9	0.28	0.0276	Nan	24.09
25.9	0.28	0.027	Nan	24.1
26.9	0.28	0.0273	Nan	24.09
27.9	0.28	0.0281	Nan	24.09
28.9	0.27	0.0277	Nan	24.09
29.9	0.27	0.0274	Nan	24.09
30.9	0.27	0.0278		24.08
31.9	0.27	0.0278		24.09
32.9	0.27	0.0271		24.09
33.9	0.27	0.0274		24.09
34.9	0.27	0.0274		24.09
35.9	0.27	0.0278		24.09
36.9	0.27	0.0274		24.08
37.9	0.27	0.0279		24.09
38.9	0.27	0.0276		24.1
39.9	0.27	0.0276		24.11
40.9	0.27	0.0274		24.08
41.9	0.28	0.028		24.08
42.9	0.28	0.028		24.09
43.9	0.28	0.0275		24.08
44.9	0.28	0.0281		24.09
45.9	0.27	0.0272		24.09
46.9	0.27	0.0276		24.08
47.9	0.27	0.028		24.09
48.9	0.27	0.0279		24.09
49.9	0.27	0.0276		24.1
50.9	0.27	0.0277		24.08
51.9	0.27	0.0274		24.09
52.9	0.27	0.0278		24.08
53.9	0.27	0.028		24.09
54.9	0.27	0.0277		24.08
55.9	0.27	0.0277		24.08
56.9	0.27	0.028		24.08
57.9	0.27	0.0277		24.08
58.9	0.28	0.0274		24.09
59.9	0.28	0.0282		24.1
60.9	0.28	0.0279		24.08	0.01
61.9	0.28	0.0282		24.09	0.01
62.9	0.55	0.0278		24.09	0.28
63.9	-14.1	0.0275		24.08	-14.37
64.9	539.14	0.0284		24.09	538.87
65.9	1720.26	0.0277		24.09	1719.99
66.9	2864.29	0.0276		24.09	2864.02
67.9	3472.95	0.0274		24.08	3472.68
68.9	3651.18	0.0278		24.08	3650.91
69.9	3106.12	0.0278		24.09	3105.85
70.9	1924	0.0274		24.09	1923.73
71.9	796.79	0.0271		24.08	796.52
72.9	220.72	0.0274		24.09	220.45
73.9	66.37	0.028		24.08	66.1
74.9	25.44	0.0282		24.08	25.17
75.9	12.8	0.0274		24.08	12.53
76.9	8.28	0.0272		24.09	8.01
77.9	6.18	0.0278		24.08	5.91
78.9	4.92	0.0272		24.08	4.65
79.9	3.93	0.0278		24.09	3.66
80.9	3.26	0.0274		24.07	2.99
81.9	2.83	0.0275		24.08	2.56
82.9	2.56	0.0277		24.08	2.29
83.9	2.33	0.0278		24.08	2.06
84.9	2.14	0.0276		24.08	1.87
85.9	1.98	0.0275		24.07	1.71
86.9	1.83	0.0272		24.08	1.56
87.9	1.7	0.0272		24.07	1.43
88.9	1.58	0.0274		24.08	1.31
89.9	1.48	0.0278		24.08	1.21
90.9	1.39	0.0279		24.08	1.12
91.9	1.31	0.0278		24.08	1.04
92.9	1.24	0.0283		24.07	0.97
93.9	1.17	0.0274		24.08	0.9
94.9	1.11	0.0274		24.08	0.84
95.9	1.06	0.0274		24.07	0.79
96.9	1	0.0273		24.07	0.73
97.9	0.96	0.0279		24.08	0.69
98.9	0.91	0.0281		24.08	0.64
99.9	0.88	0.0275		24.09	0.61
100.9	0.85	0.0276		24.08	0.58
101.9	0.82	0.0285		24.08	0.55
102.9	0.79	0.0272		24.07	0.52
103.9	0.77	0.0271		24.07	0.5
104.9	0.75	0.0273		24.07	0.48
105.9	0.72	0.0284		24.08	0.45
106.9	0.69	0.0274		24.08	0.42
107.9	0.67	0.0279		24.07	0.4
108.9	0.65	0.0275		24.07	0.38
109.9	0.63	0.0278		24.07	0.36
110.9	0.61	0.0279		24.07	0.34
111.9	0.6	0.0276		24.08	0.33
112.9	0.59	0.0276		24.08	0.32
113.9	0.58	0.0274		24.09	0.31
114.9	0.57	0.0273		24.07	0.3
115.9	0.56	0.0274		24.08	0.29
116.9	0.54	0.0279		24.07	0.27
117.9	0.53	0.0276		24.08	0.26
118.9	0.52	0.0278		24.08	0.25
119.9	0.51	0.0274		24.08	0.24
120.9	0.5	0.0276		24.08	0.23
121.9	0.49	0.0279		24.07	0.22
122.9	0.49	0.0272		24.08	0.22
123.9	0.48	0.0274		24.07	0.21
124.9	0.48	0.0278		24.08	0.21
125.9	0.47	0.0278		24.08	0.2
126.9	0.46	0.0276		24.07	0.19
127.9	0.46	0.028		24.08	0.19
128.9	0.45	0.0275		24.07	0.18
129.9	0.44	0.0274		24.08	0.17
130.9	0.44	0.0276		24.07	0.17
131.9	0.43	0.0278		24.07	0.16
132.9	0.43	0.0273		24.07	0.16
133.9	0.42	0.028		24.07	0.15
134.9	0.42	0.0278		24.07	0.15
135.9	0.41	0.0277		24.07	0.14
136.9	0.41	0.0274		24.07	0.14
137.9	0.41	0.0275		24.06	0.14
138.9	0.4	0.028		24.07	0.13
139.9	0.4	0.028		24.07	0.13
140.9	0.4	0.0278		24.07	0.13
141.9	0.39	0.0278		24.07	0.12
142.9	0.39	0.0273		24.07	0.12
143.9	0.38	0.0275		24.06	0.11
144.9	0.38	0.0276		24.07	0.11
145.9	0.37	0.0278		24.06	0.1
146.9	0.37	0.0274		24.07	0.1
147.9	0.37	0.0281		24.06	0.1
148.9	0.37	0.0272		24.06	0.1
149.9	0.36	0.0278		24.07	0.09
150.9	0.36	0.0277		24.07	0.09
151.9	0.36	0.0277		24.07	0.09
152.9	0.36	0.0278		24.07	0.09
153.9	0.36	0.0274		24.07	0.09
154.9	0.35	0.0278		24.06	0.08
155.9	0.35	0.0277		24.07	0.08
156.9	0.36	0.0273		24.07	0.09
157.9	0.36	0.0278		24.06	0.09
158.9	0.36	0.0274		24.06	0.09
159.9	0.36	0.0279		24.07	0.09
160.9	0.35	0.0274		24.06	0.08
161.9	0.35	0.0277		24.06	0.08
162.9	0.35	0.0276		24.06	0.08
163.9	0.35	0.0274		24.08	0.08
164.9	0.35	0.0274		24.06	0.08
165.9	0.35	0.0276		24.07	0.08
166.9	0.35	0.0277		24.06	0.08
167.9	0.34	0.0277		24.06	0.07
168.9	0.34	0.0279		24.07	0.07
169.9	0.33	0.0275		24.06	0.06
170.9	0.33	0.0273		24.06	0.06
171.9	0.33	0.028		24.07	0.06
172.9	0.33	0.0275		24.06	0.06
173.9	0.33	0.0271		24.06	0.06
174.9	0.33	0.0282		24.05	0.06
175.9	0.32	0.0274		24.06	0.05
176.9	0.32	0.0275		24.06	0.05
177.9	0.32	0.0278		24.05	0.05
178.9	0.32	0.0277		24.07	0.05
179.9	0.32	0.0275		24.06	0.05
180.9	0.31	0.0275		24.07	0.04
181.9	0.32	0.0271		24.06	0.05
182.9	0.32	0.0271		24.06	0.05
183.9	0.32	0.0274		24.07	0.05
184.9	0.31	0.0282		24.06	0.04
185.9	0.31	0.0278		24.06	0.04
186.9	0.31	0.0277		24.06	0.04
187.9	0.31	0.0275		24.06	0.04
188.9	0.31	0.028		24.07	0.04
189.9	0.31	0.0278		24.07	0.04
190.9	0.31	0.0278		24.06	0.04
191.9	0.31	0.0275		24.06	0.04
192.9	0.31	0.0273		24.06	0.04
193.9	0.31	0.0272		24.06	0.04
194.8	0.31	0.0276		24.06	0.04
195.8	0.3	0.0275		24.06	0.03
196.8	0.3	0.0275		24.06	0.03
197.8	0.3	0.0276		24.06	0.03
198.8	0.31	0.0274		24.06	0.04
199.8	0.31	0.0278		24.05	0.04
200.8	0.31	0.0278		24.06	0.04
201.8	0.31	0.0271		24.07	0.04
202.8	0.31	0.028		24.06	0.04
203.8	0.31	0.0274		24.06	0.04
204.8	0.3	0.0277		24.06	0.03
205.8	0.29	0.0275		24.05	0.02
206.8	0.29	0.0276		24.06	0.02
207.8	0.29	0.028		24.06	0.02
208.8	0.28	0.0271		24.06	0.01
209.8	0.28	0.0277		24.06	0.01
210.8	0.28	0.0274		24.06
211.8	0.28	0.0274		24.05
212.8	0.28	0.0276		24.05
213.8	0.29	0.0277		24.06
214.8	0.29	0.0282		24.06
215.8	0.29	0.0274		24.06
216.8	0.29	0.0276		24.06
217.8	0.29	0.0278		24.05
218.8	0.3	0.0275		24.06
219.8	0.3	0.0276		24.06
220.8	0.3	0.0269		24.06
221.8	0.3	0.028		24.06
222.8	0.3	0.0279		24.06
223.8	0.3	0.0274		24.06
224.8	0.29	0.0274		24.06
225.8	0.29	0.0278		24.06
226.8	0.29	0.0275		24.05
227.8	0.28	0.028		24.05
228.8	0.28	0.0277		24.05
229.8	0.28	0.0277		24.05
230.8	0.28	0.0271		24.05
231.8	0.28	0.0275		24.05
232.8	0.27	0.0281		24.06
233.8	0.27	0.0273		24.06
234.8	0.28	0.0276		24.05
235.8	0.28	0.0276		24.05
236.8	0.28	0.0276		24.05
237.8	0.28	0.0276		24.05
238.8	0.29	0.0279		24.05
239.8	0.28	0.0274		24.05
240.8	0.29	0.0273		24.06
241.8	0.29	0.0281		24.06
242.8	0.29	0.0281		24.06
243.8	0.29	0.0272		24.06
244.8	0.3	0.0272		24.05
245.8	0.29	0.0276		24.06
246.8	0.29	0.0278		24.06
247.8	0.29	0.0279		24.05
248.8	0.29	0.0278		24.06
249.8	0.29	0.0282		24.05
250.8	0.29	0.0282		24.04
251.8	0.29	0.0275		24.05
252.8	0.29	0.0274		24.05
253.8	0.29	0.0274		24.06
254.8	0.29	0.0279		24.06
255.8	0.29	0.0274		24.05
256.8	0.29	0.0274		24.05
257.8	0.29	0.0278		24.05
258.8	0.29	0.0271		24.05
259.8	0.29	0.0279		24.05
260.8	0.28	0.0274		24.05
261.8	0.28	0.0272		24.04
262.8	0.28	0.0268		24.04
263.8	0.28	0.028		24.05
264.8	0.28	0.0274		24.04
265.8	0.28	0.0278		24.05
266.8	0.28	0.0277		24.05
267.8	0.28	0.0277		24.04
268.8	0.28	0.0279		24.05
269.8	0.28	0.0274		24.04
270.8	0.28	0.0278		24.05
271.8	0.29	0.0274		24.04
272.8	0.29	0.0276		24.04
273.8	0.29	0.0274		24.05
274.8	0.29	0.0278		24.05
275.8	0.29	0.0281		24.05
276.8	0.28	0.0276		24.05
277.8	0.28	0.0278		24.04
278.8	0.27	0.0274		24.05
279.8	0.27	0.0278		24.05
280.8	0.27	0.0279		24.04
281.8	0.27	0.0274		24.05
282.8	0.27	0.0277		24.05
283.8	0.27	0.028		24.05
284.8	0.27	0.028		24.04
285.8	0.27	0.028		24.05
286.8	0.27	0.0278		24.04
287.8	0.27	0.0277		24.05
288.8	0.27	0.0279		24.04
289.8	0.27	0.0278		24.05
290.8	0.27	0.0276		24.03
291.8	0.27	0.0274		24.04
292.8	0.27	0.0274		24.04
293.8	0.27	0.0273		24.03
294.8	0.27	0.0278		24.03
295.8	0.27	0.0276		24.04
296.8	0.28	0.0273		24.03
297.8	0.28	0.0278		24.04	0
298.8	0.28	0.0281		24.04	0
299.8	0.28	0.0274		24.03	0
300.8	0.28	0.0278		24.04	0
301.8	0.28	0.0279		24.04	0
302.8	0.28	0.0278		24.03	0
303.8	0.28	0.0276		24.04	0
304.8	0.28	0.0277		24.03	0
305.8	0.28	0.0278		24.03	0
306.8	0.28	0.0272		24.04	0
307.8	0.28	0.0281		24.04	0
308.8	0.28	0.0279		24.03	0
309.8	0.28	0.0279		24.03	0
310.8	0.28	0.0275		24.04	0
311.8	0.27	0.028		24.04	-0.01
312.8	0.27	0.0279		24.03	-0.01
313.8	0.27	0.0271		24.03	-0.01
314.8	0.28	0.0274		24.03	0
315.8	0.28	0.0272		24.03	0
316.8	0.28	0.0277		24.03	0
317.8	0.28	0.0281		24.05	0
318.8	0.28	0.0274		24.04	0
319.8	0.28	0.0277		24.02	0
320.8	0.29	0.0274		24.04	0.01
321.8	0.29	0.0279		24.03	0.01
322.8	0.29	0.0279		24.04	0.01
323.8	0.29	0.028		24.03	0.01
324.8	0.3	0.0274		24.04	0.02
325.8	0.29	0.0271		24.04	0.01
326.8	0.29	0.0273		24.05	0.01
327.8	0.3	0.0277		24.03	0.02
328.8	0.3	0.0274		24.03	0.02
329.8	0.3	0.0276		24.03	0.02
330.8	0.3	0.0281		24.04	0.02
331.8	0.3	0.0273		24.04	0.02
332.8	0.3	0.0278		24.04	0.02
333.8	0.3	0.0279		24.05	0.02
334.8	0.3	0.0277		24.04	0.02
335.8	0.3	0.0277		24.03	0.02
336.8	0.3	0.0274		24.03	0.02
337.8	0.3	0.0277		24.03	0.02
338.8	0.3	0.0279		24.04	0.02
339.8	0.3	0.0277		24.03	0.02
340.8	0.3	0.0275		24.03	0.02
341.8	0.3	0.0276		24.03	0.02
342.8	0.31	0.0276		24.03	0.03
343.8	0.32	0.028		24.04	0.04
344.8	0.32	0.0278		24.04	0.04
345.8	0.32	0.0283		24.03	0.04
346.8	0.32	0.0279		24.03	0.04
347.8	0.32	0.0274		24.03	0.04
348.8	0.33	0.0278		24.04	0.05
349.8	0.33	0.0277		24.03	0.05
350.8	0.33	0.0274		24.03	0.05
351.8	0.33	0.0271		24.03	0.05
352.8	0.34	0.0276		24.04	0.06
353.8	0.34	0.0281		24.04	0.06
354.8	0.34	0.0285		24.04	0.06
355.8	0.34	0.0279		24.04	0.06
356.8	0.34	0.0274		24.04	0.06
357.8	0.34	0.0271		24.03	0.06
358.8	0.34	0.0277		24.04	0.06
359.8	0.34	0.0271		24.04	0.06
360.8	0.34	0.0279		24.05	0.06
361.8	0.34	0.0274		24.04	0.06
362.8	0.35	0.0277		24.04	0.07
363.8	0.35	0.0274		24.03	0.07
364.8	0.36	0.0274		24.03	0.08
365.8	0.36	0.0278		24.04	0.08
366.8	0.36	0.0274		24.05	0.08
367.7	0.35	0.0273		24.03	0.07
368.7	0.35	0.0278		24.04	0.07
369.7	0.34	0.0277		24.03	0.06
370.7	0.34	0.0274		24.04	0.06
371.7	0.34	0.028		24.04	0.06
372.7	0.34	0.0274		24.05	0.06
373.7	0.35	0.0281		24.05	0.07
374.7	0.35	0.0277		24.04	0.07
375.7	0.35	0.0276		24.04	0.07
376.7	0.35	0.0272		24.04	0.07
377.7	0.35	0.0274		24.04	0.07
378.7	0.35	0.028		24.05	0.07
379.7	0.35	0.028		24.05	0.07
380.7	0.35	0.0277		24.04	0.07
381.7	0.35	0.0273		24.05	0.07
382.7	0.35	0.0277		24.04	0.07
383.7	0.35	0.0278		24.05	0.07
384.7	0.35	0.0281		24.05	0.07
385.7	0.35	0.0264		24.04	0.07
386.7	0.35	0.0278		24.05	0.07
387.7	0.34	0.0276		24.05	0.06
388.7	0.34	0.0276		24.05	0.06
389.7	0.34	0.0279		24.05	0.06
390.7	0.34	0.0276		24.05	0.06
391.7	0.33	0.0278		24.05	0.05
392.7	0.33	0.0278		24.05	0.05
393.7	0.34	0.0277		24.05	0.06
394.7	0.33	0.0276		24.05	0.05
395.7	0.33	0.0276		24.05	0.05
396.7	0.33	0.0275		24.04	0.05
397.7	0.33	0.0278		24.04	0.05
398.7	0.33	0.0273		24.04	0.05
399.7	0.33	0.0276		24.05	0.05
400.7	0.33	0.0279		24.05	0.05
401.7	0.33	0.0275		24.04	0.05
402.7	0.33	0.0278		24.05	0.05
403.7	0.33	0.0276		24.06	0.05
404.7	0.33	0.0273		24.05	0.05
405.7	0.32	0.027		24.05	0.04
406.7	0.32	0.0274		24.06	0.04
407.7	0.32	0.0274		24.06	0.04
408.7	0.33	0.0284		24.06	0.05
409.7	0.33	0.0274		24.05	0.05
410.7	0.33	0.0273		24.04	0.05
411.7	0.34	0.0273		24.05	0.06
412.7	0.34	0.0282		24.06	0.06
413.7	0.34	0.0275		24.05	0.06
414.7	0.34	0.0274		24.05	0.06
415.7	0.34	0.0277		24.04	0.06
416.7	0.34	0.0273		24.05	0.06
417.7	0.34	0.0278		24.05	0.06
418.7	0.34	0.0281		24.05	0.06
419.7	0.34	0.0279		24.06	0.06
420.7	0.34	0.0277		24.05	0.06
421.7	0.34	0.0277		24.05	0.06
422.7	0.34	0.0273		24.04	0.06
423.7	0.34	0.0274		24.05	0.06
424.7	0.33	0.0276		24.04	0.05
425.7	0.33	0.0276		24.04	0.05
426.7	0.33	0.0278		24.05	0.05
427.7	0.33	0.0274		24.05	0.05
428.7	0.33	0.0277		24.05	0.05
429.7	0.34	0.0279		24.06	0.06
430.7	0.34	0.0278		24.05	0.06
431.7	0.34	0.0275		24.06	0.06
432.7	0.34	0.0271		24.05	0.06
433.7	0.34	0.0279		24.05	0.06
434.7	0.33	0.0274		24.04	0.05
435.7	0.33	0.0274		24.05	0.05
436.7	0.33	0.0278		24.06	0.05
437.7	0.33	0.0279		24.05	0.05
438.7	0.33	0.0274		24.05	0.05
439.7	0.33	0.0273		24.05	0.05
440.7	0.33	0.0279		24.05	0.05
441.7	0.33	0.0274		24.05	0.05
442.7	0.33	0.0273		24.05	0.05
443.7	0.33	0.0276		24.06	0.05
444.7	0.33	0.0278		24.05	0.05
445.7	0.33	0.0279		24.06	0.05
446.7	0.33	0.0278		24.05	0.05
447.7	0.33	0.0279		24.06	0.05
448.7	0.33	0.0274		24.04	0.05
449.7	0.33	0.0272		24.05	0.05
450.7	0.33	0.0274		24.05	0.05
451.7	0.33	0.028		24.06	0.05
452.7	0.33	0.028		24.05	0.05
453.7	0.32	0.0275		24.06	0.04
454.7	0.32	0.0278		24.06	0.04
455.7	0.32	0.0281		24.05	0.04
456.7	0.32	0.0277		24.05	0.04
457.7	0.32	0.0279		24.05	0.04
458.7	0.32	0.0278		24.05	0.04
459.7	0.32	0.0278		24.05	0.04
460.7	0.32	0.0274		24.04	0.04
461.7	0.32	0.0275		24.04	0.04
462.7	0.32	0.0277		24.05	0.04
463.7	0.32	0.0279		24.06	0.04
464.7	0.32	0.0275		24.05	0.04
465.7	0.32	0.0276		24.05	0.04
466.7	0.32	0.027		24.05	0.04
467.7	0.32	0.0274		24.05	0.04
468.7	0.31	0.0273		24.05	0.03
469.7	0.31	0.028		24.05	0.03
470.7	0.31	0.0275		24.05	0.03
471.7	0.3	0.0276		24.05	0.02
472.7	0.3	0.0279		24.05	0.02
473.7	0.3	0.0273		24.05	0.02
474.7	0.3	0.0271		24.04	0.02
475.7	0.3	0.0278		24.05	0.02
476.7	0.3	0.0278		24.05	0.02
477.7	0.3	0.0271		24.05	0.02
478.7	0.3	0.0276		24.05	0.02
479.7	0.29	0.0278		24.06	0.01
480.7	0.29	0.0277		24.05	0.01
481.7	0.29	0.0276		24.05	0.01
482.7	0.29	0.0277		24.05	0.01
483.7	0.3	0.0278		24.06	0.02
484.7	0.3	0.0277		24.05	0.02
485.7	0.3	0.028		24.06	0.02
486.7	0.3	0.0281		24.05	0.02
487.7	0.3	0.0276		24.05	0.02
488.7	0.3	0.0277		24.05	0.02
489.7	0.3	0.0273		24.05	0.02
490.7	0.3	0.0275		24.03	0.02
491.7	0.3	0.0277		24.06	0.02
492.7	0.3	0.0278		24.05	0.02
493.7	0.31	0.0278		24.04	0.03
494.7	0.31	0.0274		24.04	0.03
495.7	0.31	0.0274		24.04	0.03
496.7	0.31	0.0277		24.04	0.03
497.7	0.3	0.0274		24.04	0.02
498.7	0.3	0.0276		24.05	0.02
499.7	0.3	0.0274		24.05	0.02
500.7	0.3	0.0271		24.04	0.02
501.7	0.3	0.0276		24.05	0.02
502.7	0.31	0.027		24.04	0.03
503.7	0.31	0.028		24.05	0.03
504.7	0.31	0.0278		24.05	0.03
505.7	0.3	0.0277		24.05	0.02
506.7	0.3	0.0278		24.05	0.02
507.7	0.3	0.0278		24.05	0.02
508.7	0.3	0.0279		24.05	0.02
509.7	0.3	0.0276		24.04	0.02
510.7	0.3	0.0276		24.05	0.02
511.7	0.3	0.0271		24.04	0.02
512.7	0.29	0.0276		24.04	0.01
513.7	0.29	0.0277		24.05	0.01
514.7	0.29	0.0275		24.05	0.01
515.7	0.29	0.0276		24.05	0.01
516.7	0.29	0.0277		24.05	0.01
517.7	0.29	0.0281		24.04	0.01
518.7	0.29	0.0276		24.05	0.01
519.7	0.29	0.0277		24.05	0.01
520.7	0.29	0.0278		24.04	0.01
521.7	0.29	0.0274		24.04	0.01
522.7	0.29	0.0273		24.04	0.01
523.7	0.29	0.0278		24.06	0.01
524.7	0.29	0.0278		24.05	0.01
525.7	0.3	0.0281		24.05	0.02
526.7	0.3	0.0278		24.03	0.02
527.7	0.3	0.0275		24.04	0.02
528.7	0.3	0.0277		24.04	0.02
529.7	0.3	0.0281		24.05	0.02
530.7	0.3	0.0279		24.05	0.02
531.7	0.3	0.0274		24.05	0.02
532.7	0.31	0.0278		24.04	0.03
533.7	0.3	0.028		24.05	0.02
534.7	0.3	0.0278		24.05	0.02
535.7	0.3	0.0276		24.05	0.02
536.7	0.3	0.0278		24.04	0.02
537.7	0.3	0.0279		24.05	0.02
538.7	0.3	0.0281		24.05	0.02
539.7	0.3	0.0276		24.04	0.02
540.7	0.3	0.0281		24.05	0.02
541.6	0.3	0.0278		24.05	0.02
542.6	0.3	0.0276		24.04	0.02
543.6	0.3	0.0277		24.04	0.02
544.6	0.29	0.0275		24.04	0.01
545.6	0.29	0.0275		24.04	0.01
546.6	0.29	0.0274		24.04	0.01
547.6	0.29	0.0274		24.05	0.01
548.6	0.29	0.0274		24.04
549.6	0.28	0.0276		24.04
550.6	0.28	0.0278		24.04
551.6	0.28	0.0282		24.05
552.6	0.28	0.0278		24.04
553.6	0.27	0.0274		24.04
554.6	0.27	0.0278		24.04
555.6	0.28	0.0274		24.05
556.6	0.28	0.0274		24.04
557.6	0.28	0.028		24.04
558.6	0.28	0.0274		24.04
559.6	0.29	0.0273		24.03
560.6	0.29	0.0279		24.04
561.6	0.28	0.0278		24.04
562.6	0.28	0.0274		24.04
563.6	0.28	0.0276		24.04
564.6	0.28	0.028		24.03
565.6	0.29	0.0272		24.03
566.6	0.29	0.0271		24.04
567.6	0.29	0.0281		24.04
568.6	0.29	0.0278		24.04
569.6	0.29	0.0278		24.03
570.6	0.29	0.0276		24.04
571.6	0.29	0.0272		24.03
572.6	0.29	0.0278		24.04
573.6	0.29	0.0278		24.04
574.6	0.29	0.0275		24.03
575.6	0.29	0.0274		24.04
576.6	0.3	0.0278		24.04	0.02
577.6	0.3	0.0276		24.04	0.02
578.6	0.3	0.0277		24.04	0.02
579.6	0.31	0.0273		24.03	0.03
580.6	0.3	0.0275		24.03	0.02
581.6	0.3	0.0275		24.04	0.02
582.6	0.3	0.0271		24.04	0.02
583.6	0.3	0.028		24.04	0.02
584.6	0.29	0.0276		24.03	0.01
585.6	0.3	0.0281		24.03	0.02
586.6	0.3	0.0271		24.03	0.02
587.6	0.3	0.0278		24.04	0.02
588.6	0.3	0.0284		24.04	0.02
589.6	0.3	0.0271		24.04	0.02
590.6	0.29	0.0278		24.04	0.01
591.6	0.29	0.0274		24.04	0.01
592.6	0.29	0.0273		24.03	0.01
593.6	0.29	0.0278		24.03	0.01
594.6	0.29	0.0276		24.03	0.01
595.6	0.29	0.0278		24.03	0.01
596.6	0.29	0.028		24.04	0.01
597.6	0.29	0.0272		24.03	0.01
598.6	0.29	0.028		24.05	0.01
599.6	0.29	0.0278		24.03	0.01
600.6	0.29	0.0275		24.04	0.01
601.6	0.29	0.0275		24.03	0.01
602.6	0.29	0.0276		24.03	0.01
603.6	0.29	0.0278		24.04	0.01
604.6	0.29	0.0276		24.03	0.01
605.6	0.29	0.0277		24.03	0.01
606.6	0.29	0.0274		24.03	0.01
607.6	0.29	0.0272		24.03	0.01
608.6	0.29	0.0277		24.03	0.01
609.6	0.29	0.0276		24.03	0.01
610.6	0.29	0.0276		24.04	0.01
611.6	0.29	0.0282		24.03	0.01
612.6	0.29	0.028		24.04	0.01
613.6	0.29	0.0274		24.03	0.01
614.6	0.29	0.0273		24.03	0.01
615.6	0.29	0.0278		24.03	0.01
616.6	0.29	0.0277		24.04	0.01
617.6	0.29	0.0276		24.02	0.01
618.6	0.3	0.0273		24.03	0.02
619.6	0.29	0.0285		24.05	0.01
620.6	0.3	0.028		24.04	0.02
621.6	0.29	0.0281		24.03	0.01
622.6	0.29	0.0278		24.03	0.01
623.6	0.29	0.0274		24.03	0.01
624.6	0.29	0.0277		24.04	0.01
625.6	0.29	0.0274		24.03	0.01
626.6	0.29	0.0278		24.04	0.01
627.6	0.29	0.0275		24.04	0.01
628.6	0.29	0.0281		24.04	0.01
629.6	0.29	0.0276		24.03	0.01
630.6	0.29	0.0277		24.05	0.01
631.6	0.28	0.0273		24.03	0
632.6	0.28	0.0271		24.03	0
633.6	0.28	0.0275		24.03	0
634.6	0.29	0.0281		24.04	0.01
635.6	0.29	0.0274		24.03	0.01
636.6	0.29	0.0278		24.04	0.01
637.6	0.29	0.0276		24.03	0.01
638.6	0.29	0.0277		24.04	0.01
639.6	0.28	0.0276		24.04	0
640.6	0.28	0.0276		24.03	0
641.6	0.28	0.0274		24.03	0
642.6	0.28	0.0274		24.04	0
643.6	0.28	0.028		24.04	0
644.6	0.28	0.0278		24.04	0
645.6	0.29	0.0269		24.03	0.01
646.6	0.29	0.0279		24.04	0.01
647.6	0.3	0.028		24.04	0.02
648.6	0.3	0.028		24.05	0.02
649.6	0.3	0.0278		24.04	0.02
650.6	0.31	0.0274		24.03	0.03
651.6	0.3	0.0277		24.03	0.02
652.6	0.3	0.0275		24.04	0.02
653.6	0.29	0.028		24.04	0.01
654.6	0.29	0.0274		24.04	0.01
655.6	0.29	0.0275		24.04	0.01
656.6	0.3	0.0276		24.04	0.02
657.6	0.3	0.0274		24.04	0.02
658.6	0.3	0.0274		24.04	0.02
659.6	0.3	0.027		24.03	0.02
660.6	0.3	0.0278		24.03	0.02
661.6	0.3	0.0274		24.04	0.02
662.6	0.3	0.0274		24.04	0.02
663.6	0.3	0.0281		24.05	0.02
664.6	0.3	0.0281		24.05	0.02
665.6	0.3	0.0277		24.04	0.02
666.6	0.3	0.028		24.05	0.02
667.6	0.3	0.0274		24.05	0.02
668.6	0.3	0.0278		24.04	0.02
669.6	0.3	0.0272		24.05	0.02
670.6	0.3	0.0274		24.04	0.02
671.6	0.3	0.0277		24.04	0.02
672.6	0.3	0.0274		24.04	0.02
673.6	0.3	0.0277		24.04	0.02
674.6	0.3	0.0281		24.05	0.02
675.6	0.3	0.028		24.04	0.02
676.6	0.3	0.0281		24.04	0.02
677.6	0.3	0.0274		24.03	0.02
678.6	0.3	0.0278		24.04	0.02
679.6	0.29	0.0279		24.04	0.01
680.6	0.29	0.0273		24.05	0.01
681.6	0.29	0.028		24.05	0.01
682.6	0.29	0.0274		24.03	0.01
683.6	0.3	0.0276		24.05	0.02
684.6	0.3	0.0284		24.05	0.02
685.6	0.3	0.0272		24.04	0.02
686.6	0.3	0.0282		24.04	0.02
687.6	0.3	0.0276		24.04	0.02
688.6	0.3	0.0277		24.04	0.02
689.6	0.3	0.0277		24.05	0.02
690.6	0.3	0.028		24.04	0.02
691.6	0.3	0.0273		24.05	0.02
692.6	0.3	0.0278		24.04	0.02
693.6	0.29	0.028		24.05	0.01
694.6	0.28	0.0278		24.04	0
695.6	0.28	0.0273		24.05	0
696.6	0.29	0.0276		24.03	0.01
697.6	0.29	0.0272		24.05	0.01
698.6	0.29	0.0272		24.04	0.01
699.6	0.29	0.0278		24.04	0.01
700.6	0.3	0.0275		24.04	0.02
701.6	0.3	0.0274		24.04	0.02
702.6	0.3	0.0274		24.05	0.02
703.6	0.3	0.0278		24.04	0.02
704.6	0.3	0.0283		24.04	0.02
705.6	0.3	0.0274		24.04	0.02
706.6	0.29	0.0279		24.04	0.01
707.6	0.29	0.0279		24.04	0.01
708.6	0.29	0.0278		24.04	0.01
709.6	0.29	0.028		24.03	0.01
710.6	0.29	0.0274		24.04	0.01
711.6	0.3	0.028		24.05	0.02
712.6	0.3	0.0274		24.05	0.02
713.6	0.31	0.0281		24.04	0.03
714.5	0.31	0.0273		24.04	0.03
715.5	0.3	0.0271		24.03	0.02
716.5	0.3	0.0276		24.04	0.02
717.5	0.3	0.0278		24.04	0.02
718.5	0.29	0.0282		24.04	0.01
719.5	0.29	0.0279		24.05	0.01
720.5	0.3	0.0281		24.04	0.02
721.5	0.29	0.0278		24.05	0.01
722.5	0.3	0.0276		24.04	0.02
723.5	0.29	0.028		24.05	0.01
724.5	0.3	0.0276		24.03	0.02
725.5	0.29	0.0274		24.04	0.01
726.5	0.29	0.0281		24.05	0.01
727.5	0.29	0.0277		24.03	0.01
728.5	0.29	0.0284		24.03	0.01
729.5	0.3	0.028		24.05	0.02
730.5	0.3	0.0277		24.05	0.02
731.5	0.31	0.0278		24.04	0.03
732.5	0.31	0.0281		24.04	0.03
733.5	0.31	0.0279		24.04	0.03
734.5	0.31	0.0279		24.04	0.03
735.5	0.31	0.0278		24.03	0.03
736.5	0.31	0.0309		24.04	0.03
737.5	0.3	0.0277		24.04	0.02
738.5	0.3	0.028		24.05	0.02
739.5	0.31	0.0278		24.04	0.03
740.5	0.3	0.0276		24.05	0.02
741.5	0.3	0.0278		24.04	0.02
742.5	0.3	0.0276		24.04	0.02
743.5	0.3	0.0276		24.03	0.02
744.5	0.3	0.0281		24.04	0.02
745.5	0.3	0.0277		24.04	0.02
746.5	0.3	0.0276		24.04	0.02
747.5	0.29	0.0279		24.04	0.01
748.5	0.29	0.0274		24.03	0.01
749.5	0.29	0.0271		24.03	0.01
750.5	0.29	0.0274		24.04	0.01
751.5	0.29	0.0276		24.04	0.01
752.5	0.29	0.0274		24.03	0.01
753.5	0.29	0.0281		24.03	0.01
754.5	0.28	0.0277		24.04	0
755.5	0.28	0.0278		24.04	0
756.5	0.29	0.0275		24.04
757.5	0.29	0.0274		24.04
758.5	0.29	0.0273		24.03
759.5	0.29	0.0271		24.04
760.5	0.29	0.0278		24.04
761.5	0.29	0.0281		24.04
762.5	0.28	0.0274		24.03
763.5	0.29	0.0277		24.04
764.5	0.29	0.0281		24.05
765.5	0.29	0.0278		24.03
766.5	0.29	0.0277		24.04
767.5	0.29	0.0274		24.04
768.5	0.3	0.0279		24.03
769.5	0.29	0.0281		24.05
770.5	0.29	0.0274		24.03
771.5	0.29	0.0281		24.05
772.5	0.29	0.0274		24.04
773.5	0.29	0.0279		24.03
774.5	0.29	0.028		24.04
775.5	0.29	0.0271		24.03
776.5	0.29	0.0277		24.03
777.5	0.28	0.0276		24.04
778.5	0.28	0.0278		24.03
779.5	0.28	0.0278		24.03

## Sheet: Analysis
Anaysis of CO2 standards by laser-spectroscopy, reported on scale WMO_CO2_X2007
Calculate response as CO2_X2007 ratio to CB11941
e.g. CB11873 = 357.398/405.252 = 0.881915
CO2 grav standards, 2018				analysis result
cylinder	CO2_grav	CO2_grav_unc	%unc	CO2_X2007	CO2_X2007_unc	CH4	13C-CO2	18O-CO2	Response	Unc	Ratio to X2007 Scale
	ppm	ppm	%	ppm	ppm	ppb	per mil	per mil
CB11873	357.545	0.059	0.000165014	357.397	0.106988	16.7	-29.4	-39.1	0.881915	2.79801e-05	1.00041
CB11906	397.497	0.062	0.000155976	397.335	0.116374	15.9	-29.4	-38.9	0.980465	2.51677e-05	1.00041
CB11941	405.337	0.073	0.000180097	405.251	0.118234	17.3	-29.3	-38.7	1	2.4676e-05	1.00021
CB11976	449.301	0.075	0.000166926	449.021	0.12852	19.4	-29.5	-38.9	1.10801	2.22706e-05	1.00062
CB12009	491.763	0.077	0.000156579	491.465	0.138494	21.3	-29.4	-38.7	1.21274	3.94855e-05	1.00061
CO2 analysis uncertainty is 0.01 ppm (analytical reproducibility only)										mean	1.00045
X2007 uncertainty is ~0.025% and includes scale uncertainty related to manometric method										std dev	0.000169173
